# Supplementary material for: Simulating the Effects of Different Textural Soils and N Management on Maize Yield, N Fates, and Water and N Use Efficiencies in Northeast China
Source: MDPI journal article supplement (doi:10.3390/plants11233338), 2022-12-01
Supplement: s1 [file s1]

## Supplementary Materials

# Simulating the Effects of Different Textural Soils and N Management on Maize Yield, N Fates, and Water and N Use Efficiencies in Northeast China

Fanchao Meng <sup>1</sup>, Kelin Hu <sup>2,\*</sup>, Puyu Feng <sup>2</sup>, Guozhong Feng <sup>1</sup> and Qiang Gao <sup>1,\*</sup>

<sup>1</sup> College of Resources and Environmental Sciences, Key Laboratory of Straw Comprehensive Utilization and Black Soil Conservation, Jilin Agricultural University, Changchun 130118, China

<sup>2</sup> College of Land Science and Technology, Key Laboratory of Arable Land Conservation (North China), Ministry of Agriculture and Rural Affairs, China Agricultural University, Beijing 100193, China

\* Correspondence: hukel@cau.edu.cn (K.H.); gyt199962@126.com (Q.G.)

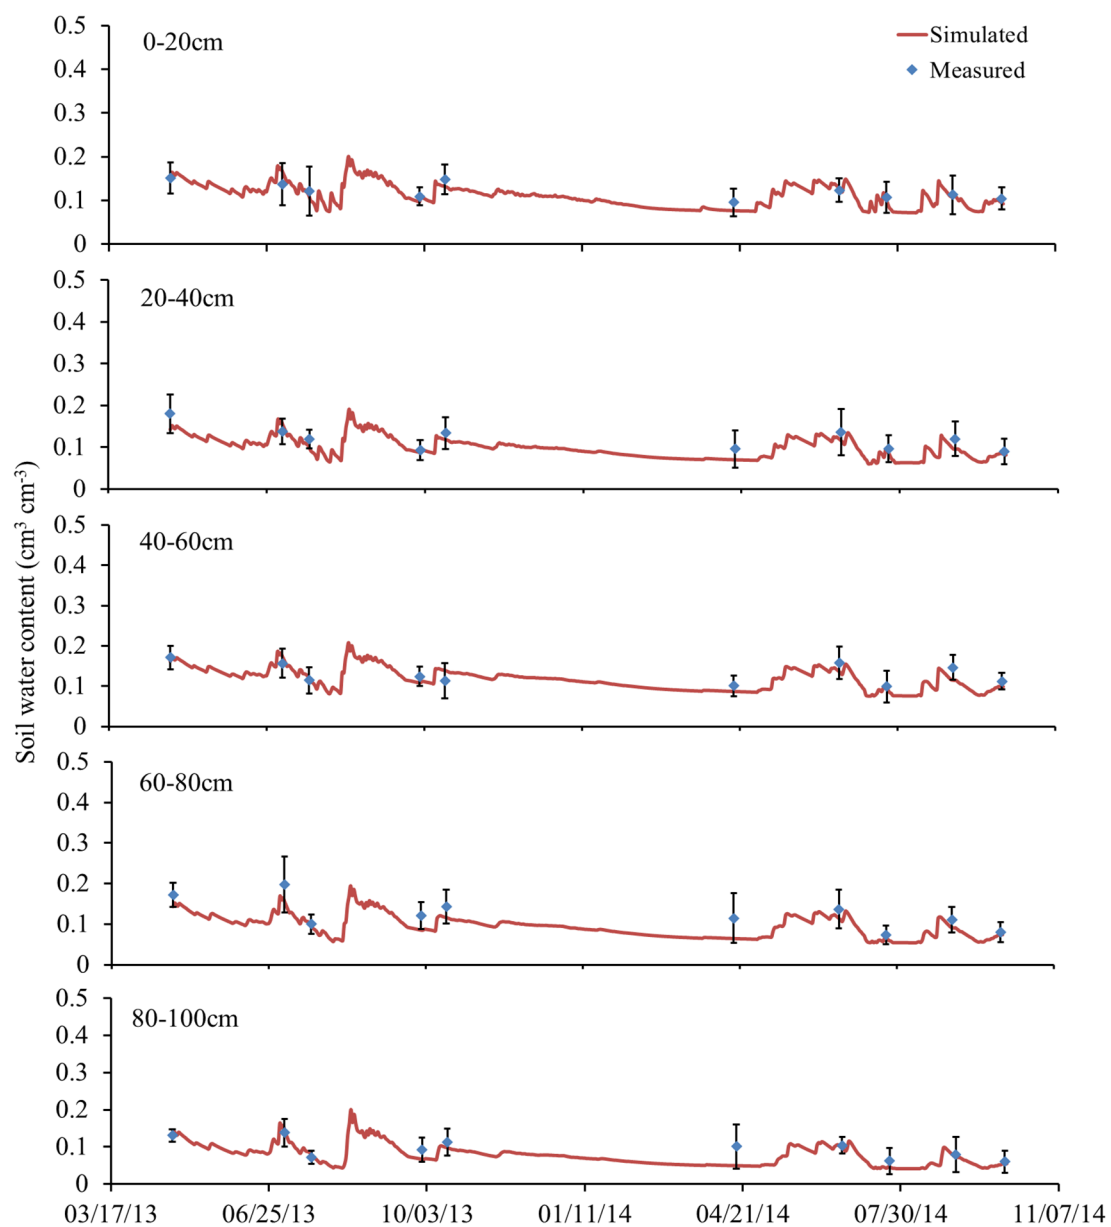

**Figure S1.** Comparison of simulated and measured soil water content at different depths under N312 treatment in Sandy loam soil.

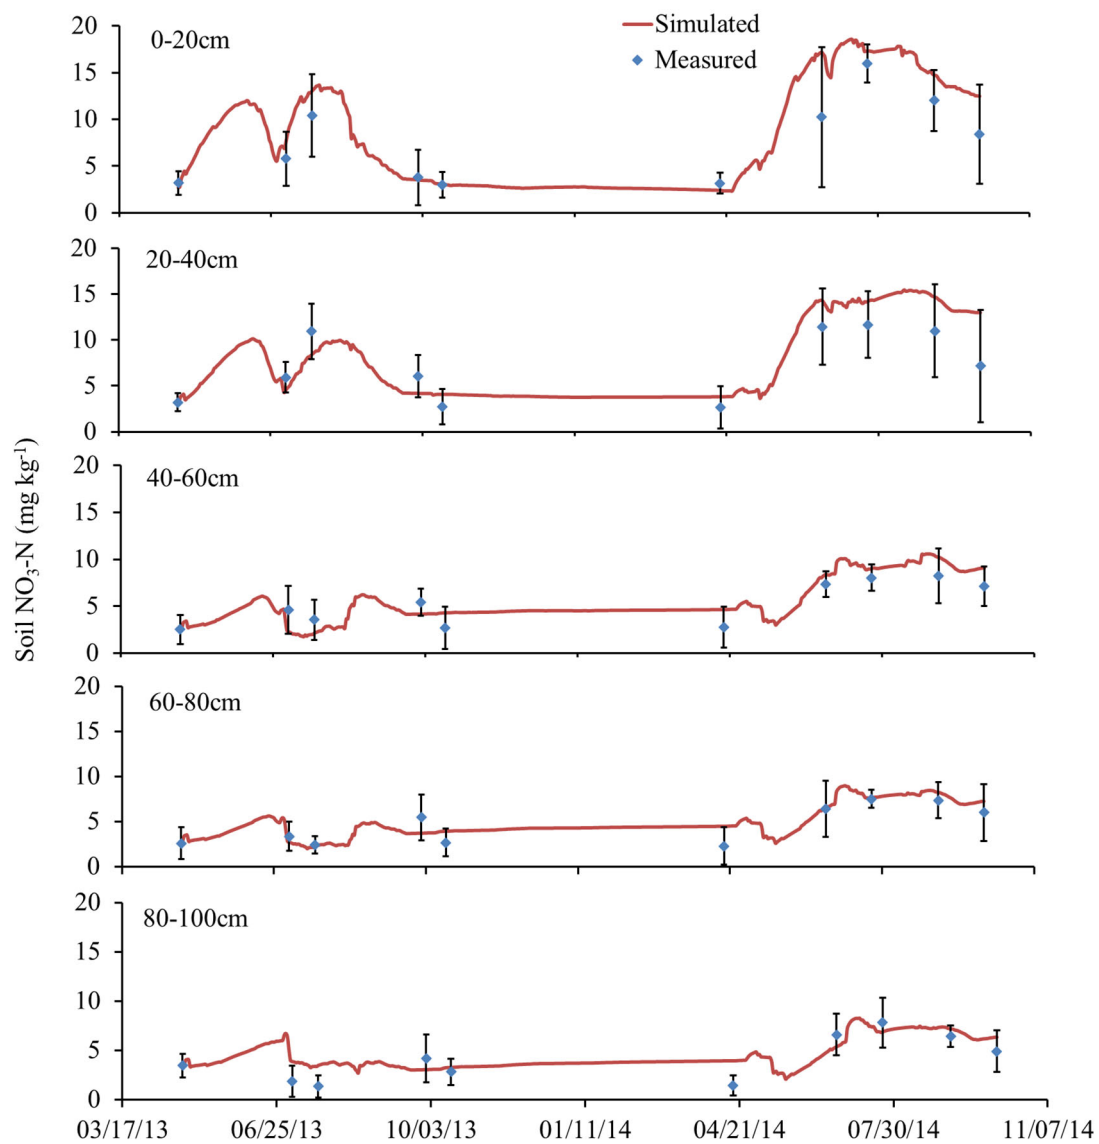

**Figure S2.** Comparison of simulated and measured soil nitrate concentration at different depths under N312 treatment in Sandy loam soil.

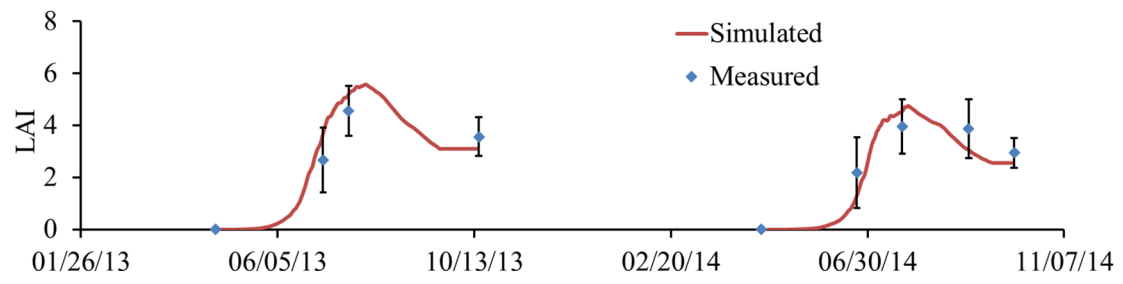

**Figure S3.** Comparison of measured and simulated leaf area index (LAI) under N312 treatment in Sandy loam soil.

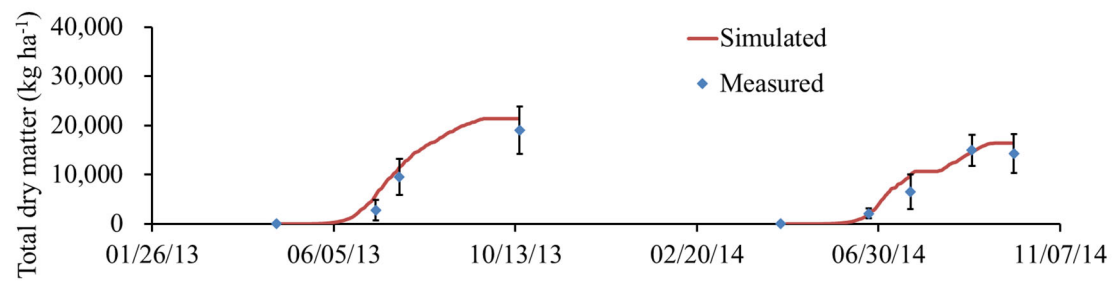

**Figure S4.** Comparison of measured and simulated total dry matter (TDM) under N312 treatment in Sandy loam soil.

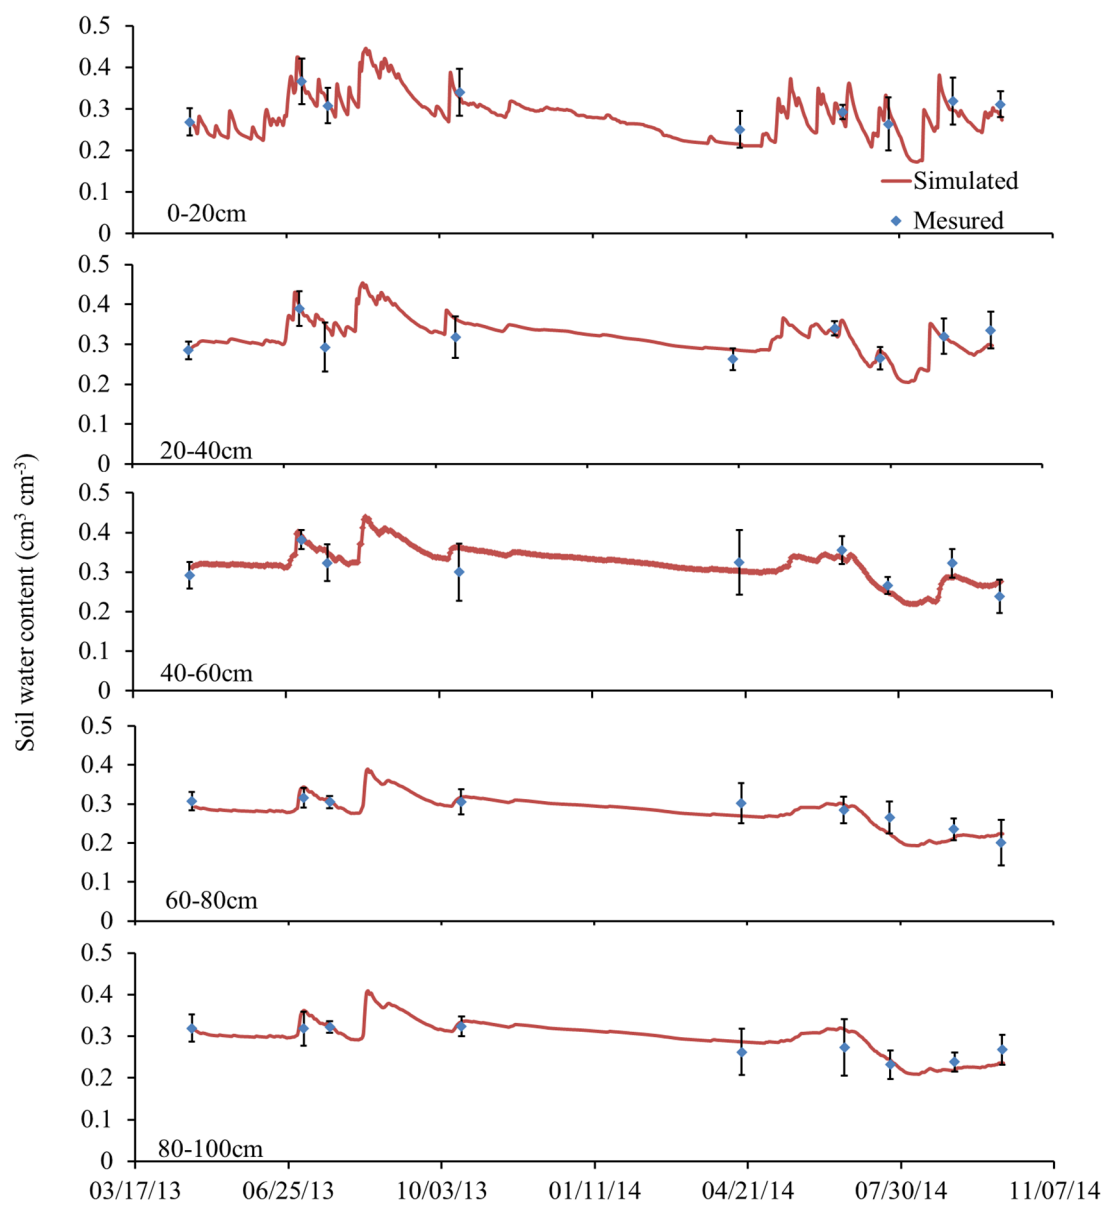

**Figure S5.** Comparison of simulated and measured soil water content at different depths under N240 treatment in loamy clay soil.

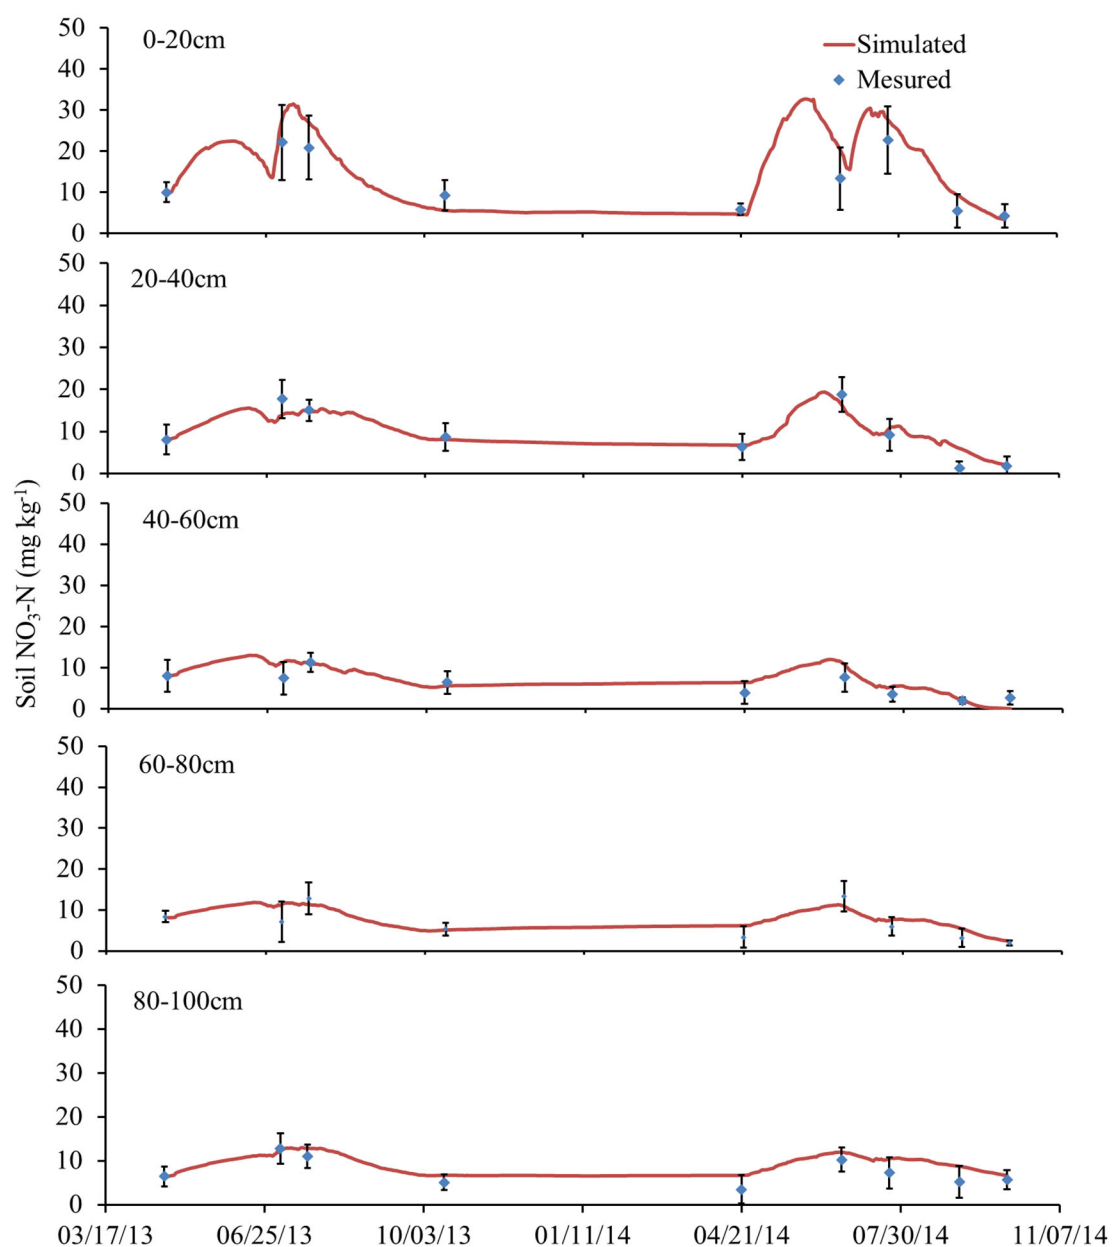

**Figure S6.** Comparison of simulated and measured soil nitrate concentration at different depths under N240 treatment in loamy clay soil.

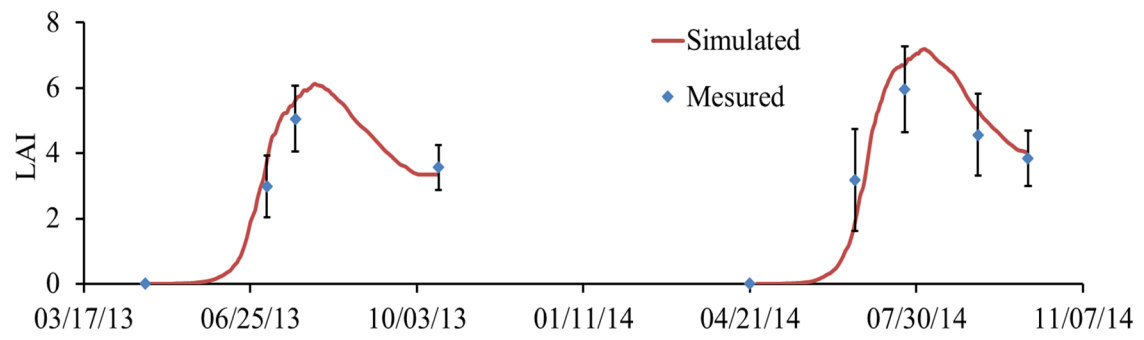

**Figure S7.** Comparison of measured and simulated leaf area index (LAI) under N240 treatment in loamy clay soil.



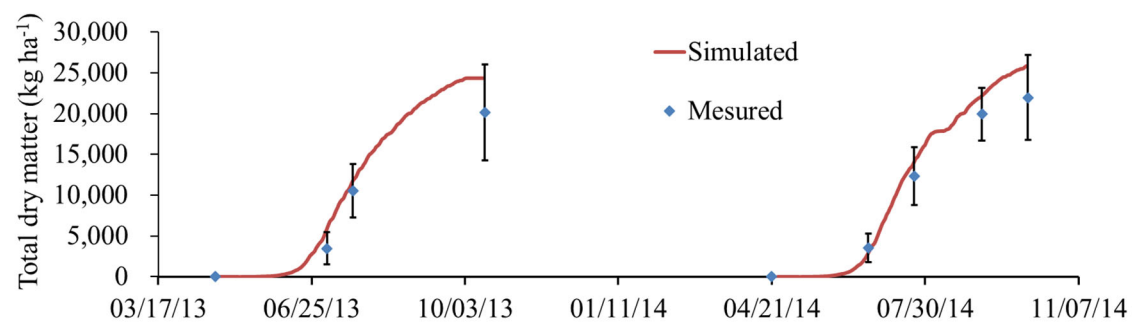

**Figure S8.** Comparison of measured and simulated total dry matter (TDM) under N240 treatment in loamy clay soil.

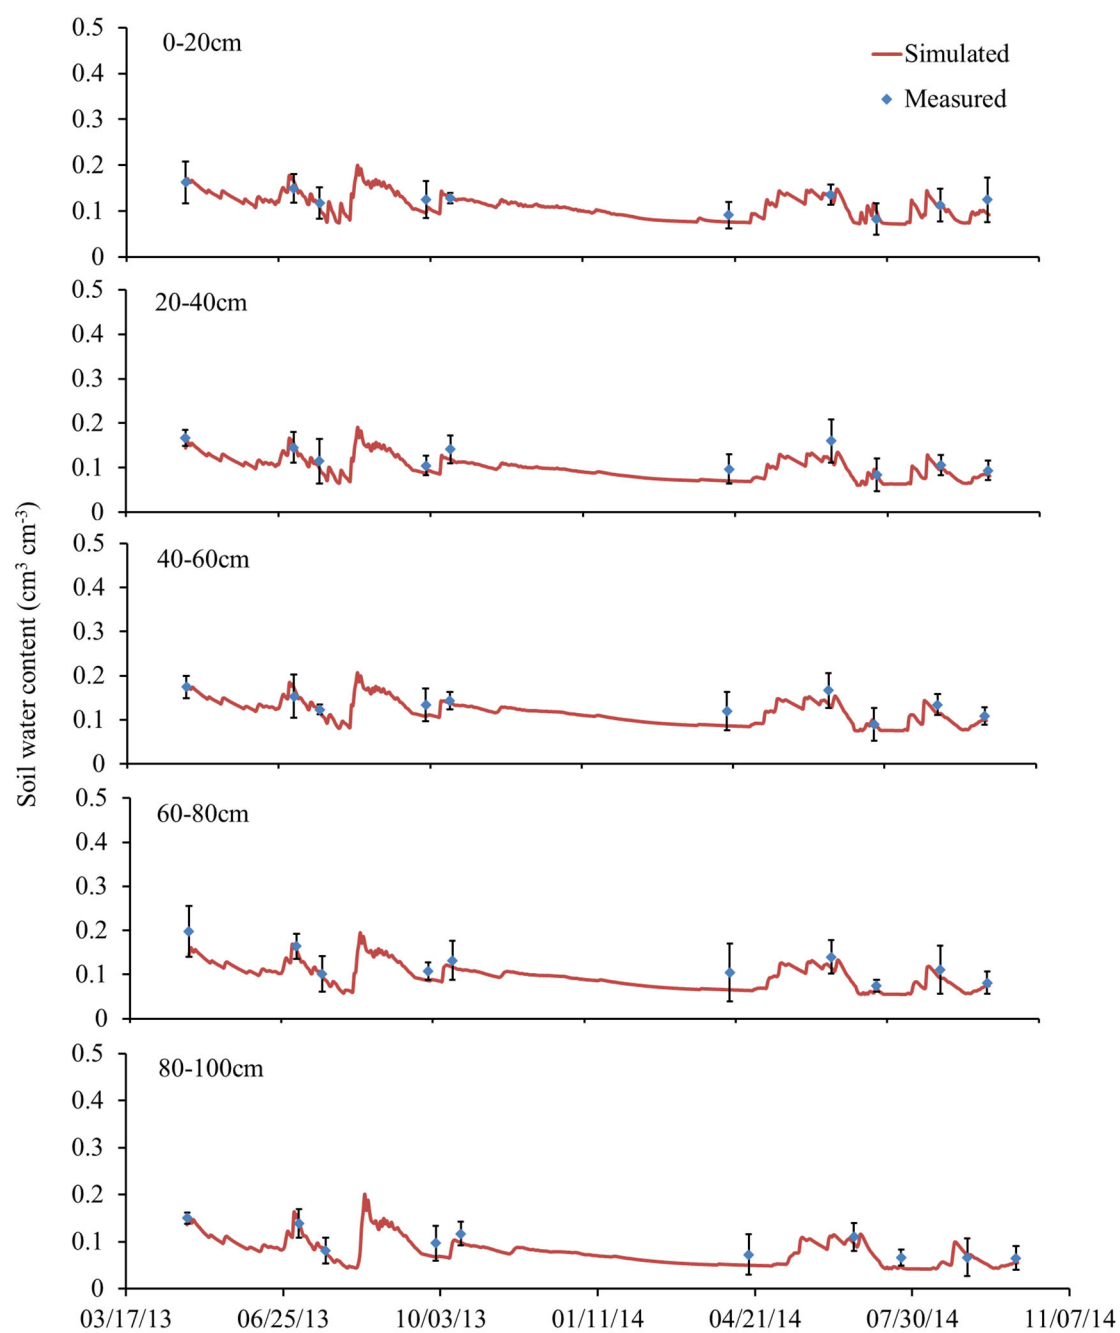

**Figure S9.** Comparison of simulated and measured soil water content at different depths under N240 treatment in Sandy loam soil.

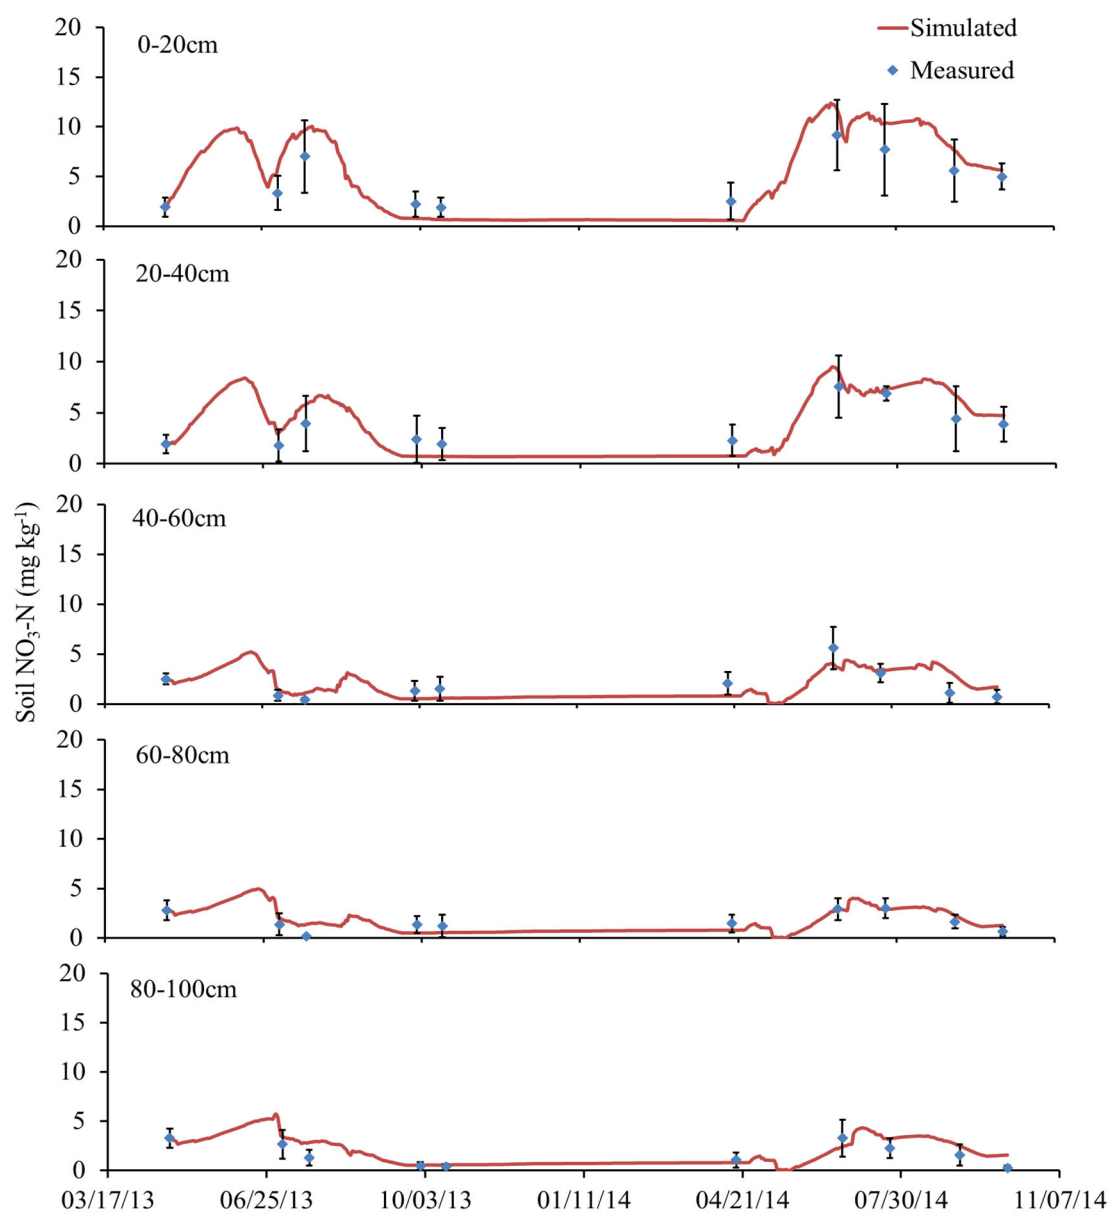

**Figure S10.** Comparison of simulated and measured soil nitrate concentration at different depths under N240 treatment in Sandy loam soil.

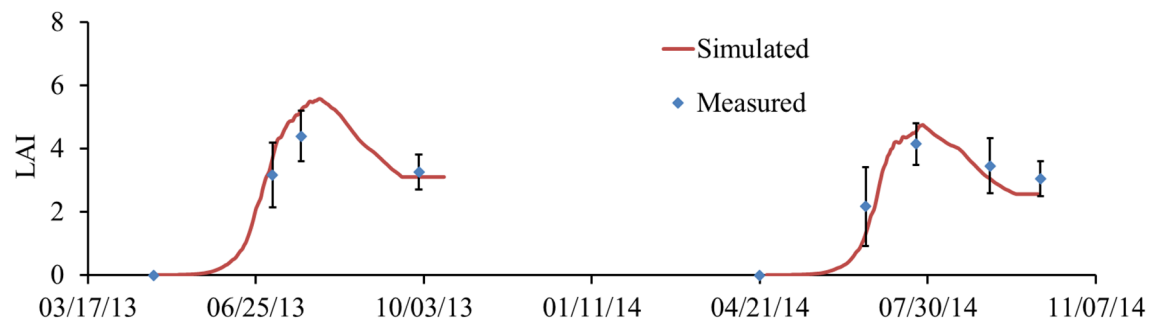

**Figure S11.** Comparison of measured and simulated leaf area index (LAI) under N240 treatment in Sandy loam soil

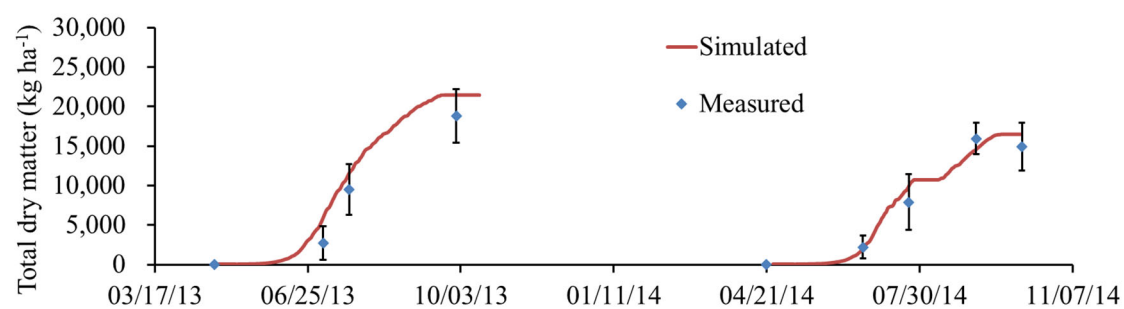

**Figure S12.** Comparison of measured and simulated total dry matter (TDM) under N240 treatment in Sandy loam soil.

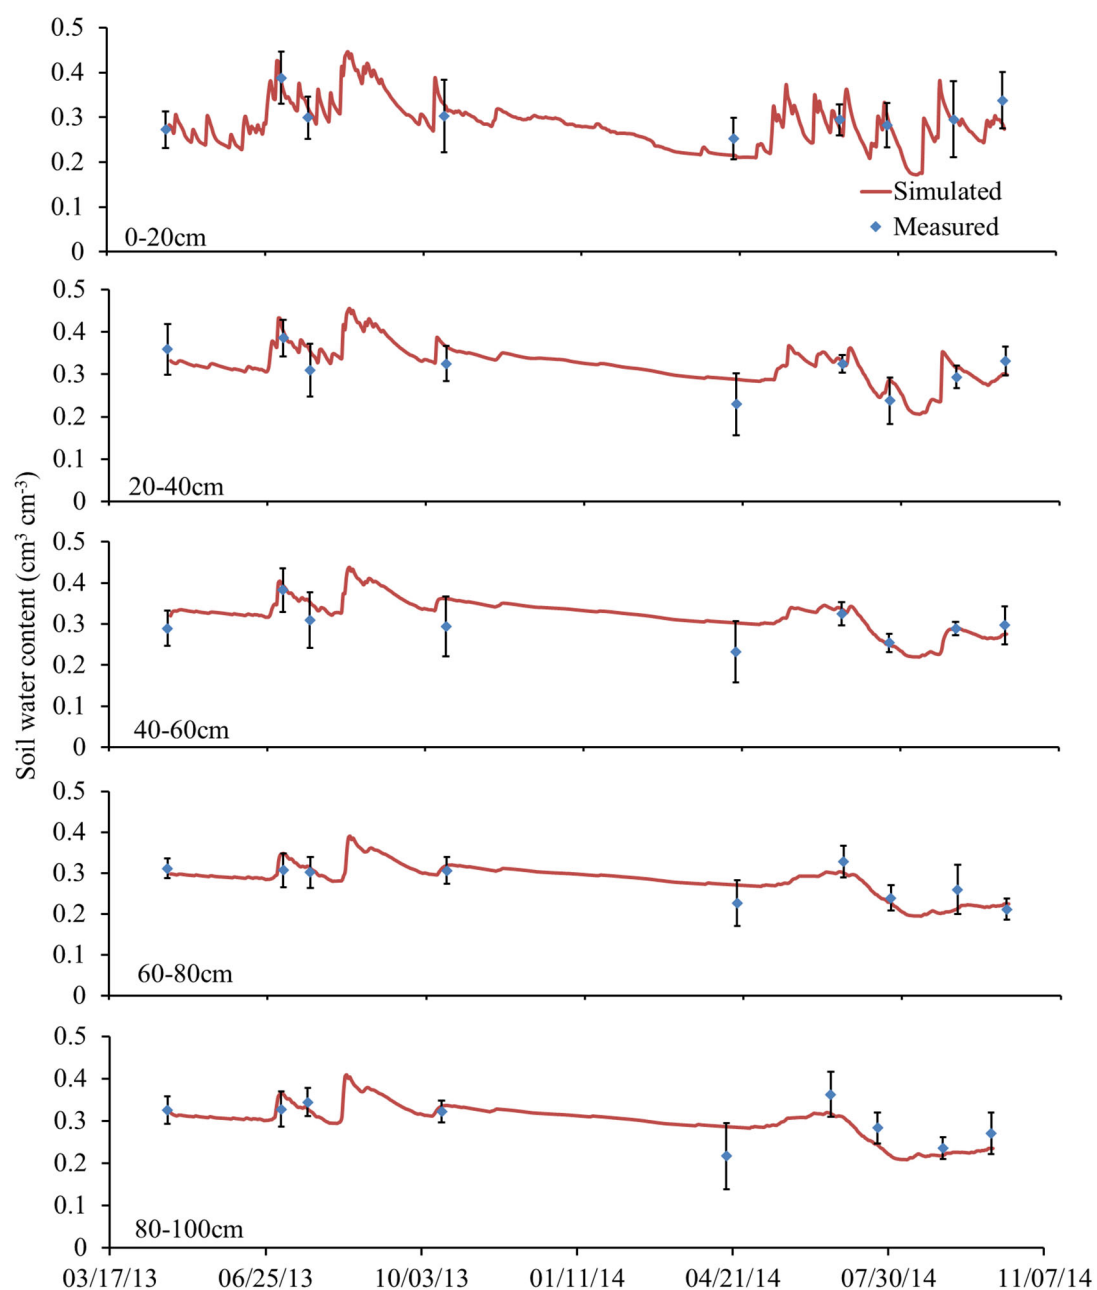

**Figure S13.** Comparison of simulated and measured soil water content at different depths under N168 treatment in loamy clay soil.

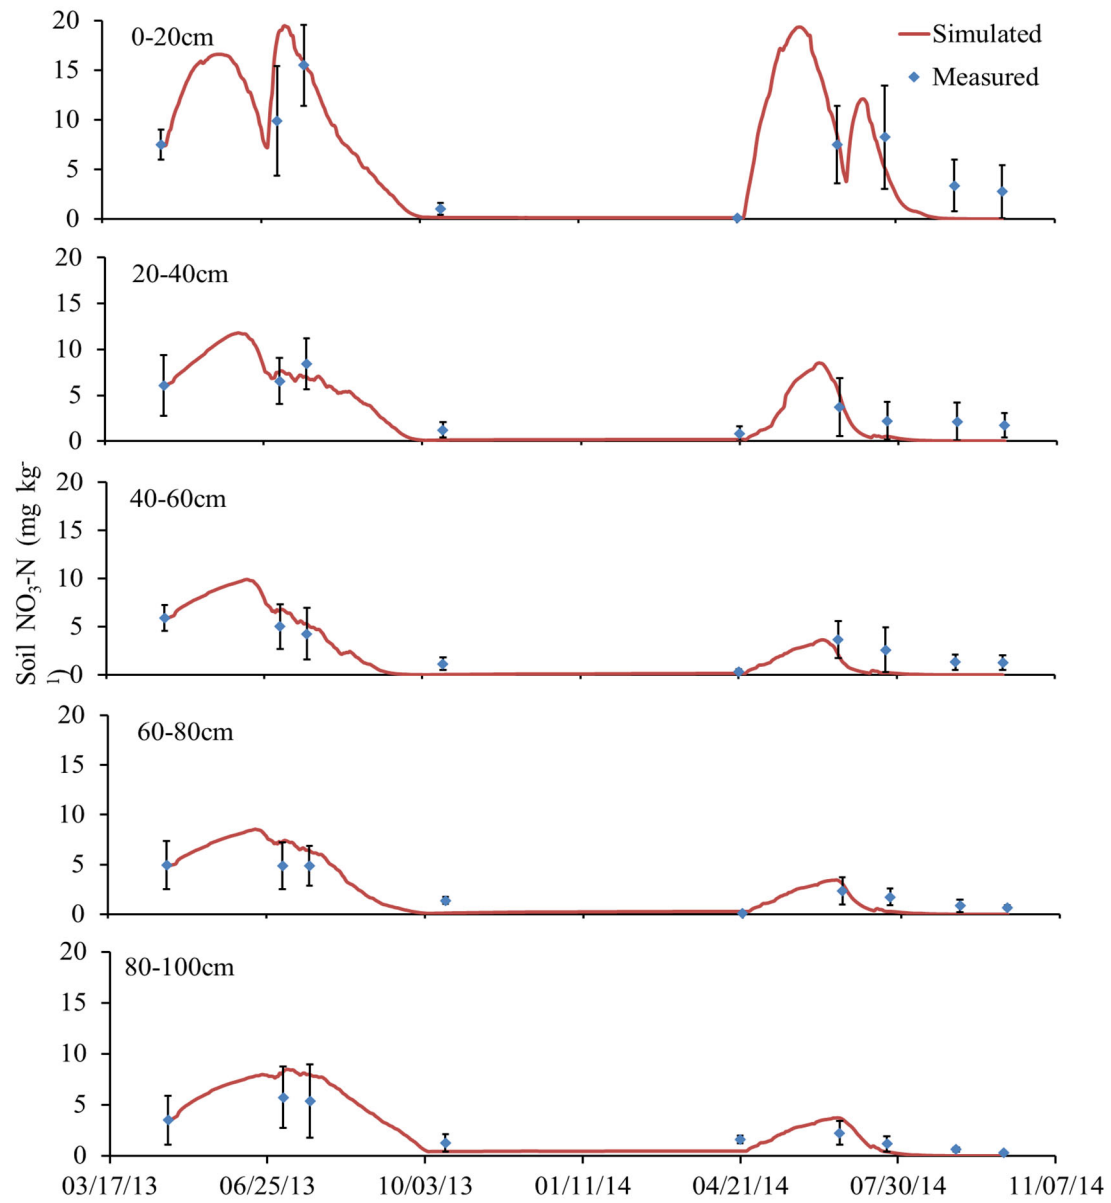

**FigureS14.** Comparison of simulated and measured soil nitrate concentration at different depths under N168 treatment in loamy clay soil.

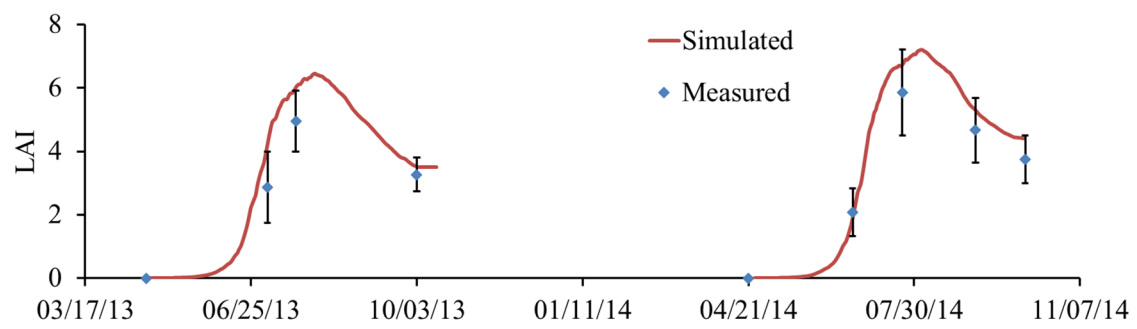

**Figure S15.** Comparison of measured and simulated leaf area index (LAI) under N168 treatment in loamy clay soil.



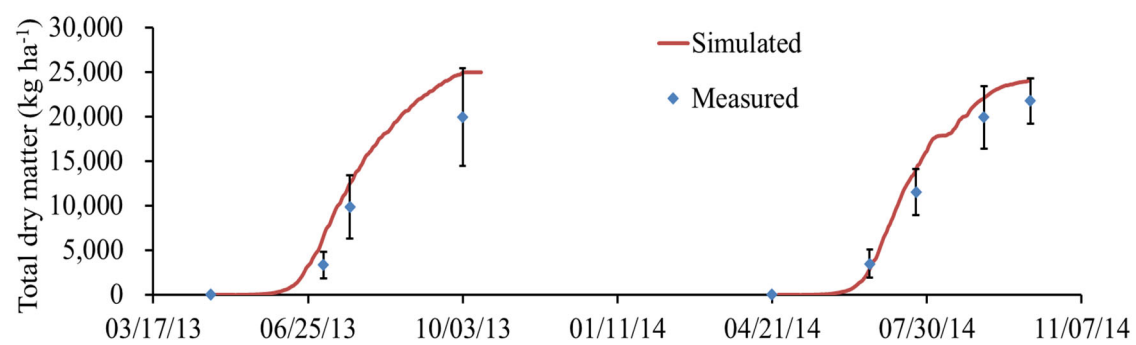

**Figure S16.** Comparison of measured and simulated total dry matter (TDM) under N168 treatment in loamy clay soil.

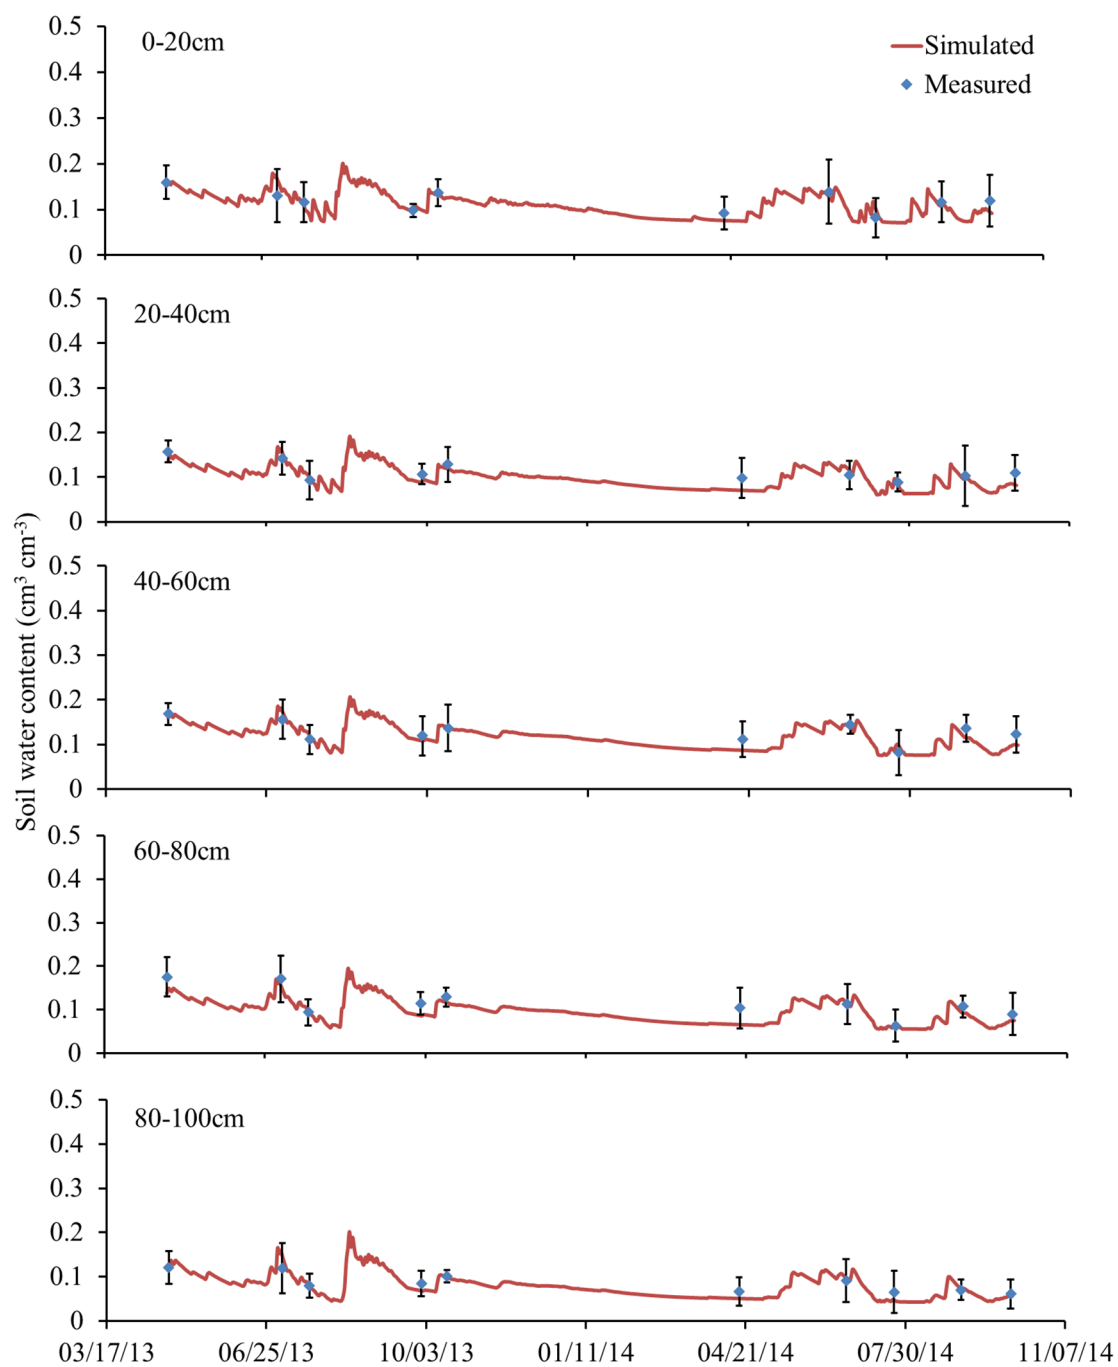

**Figure S17.** Comparison of simulated and measured soil water content at different depths under N168 treatment in Sandy loam soil.

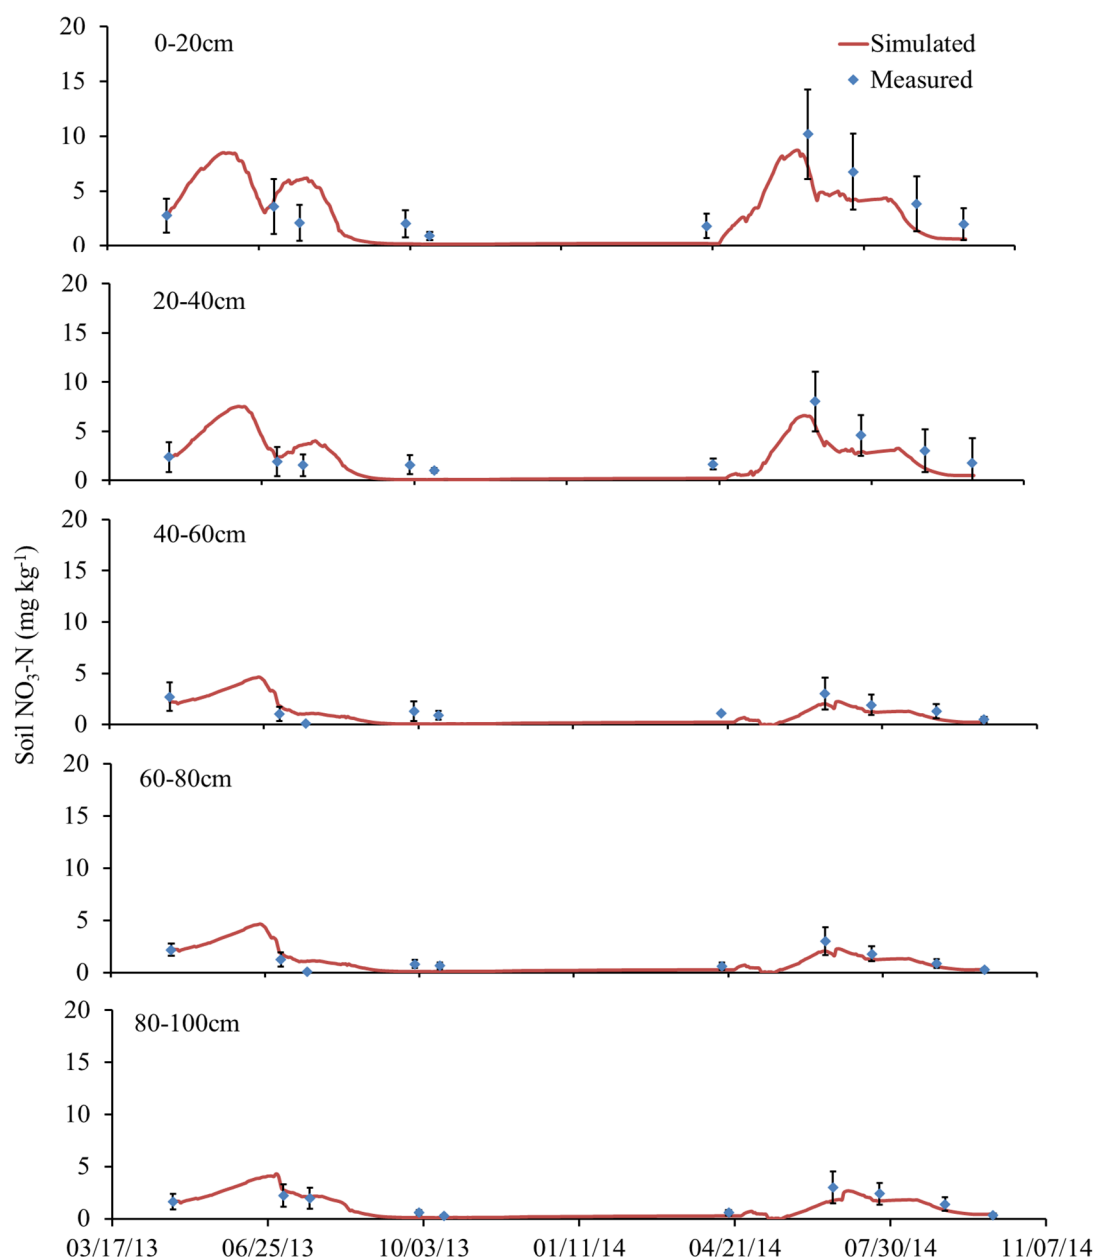

**Figure S18.** Comparison of simulated and measured soil nitrate concentration at different depths under N168 treatment in Sandy loam soil.

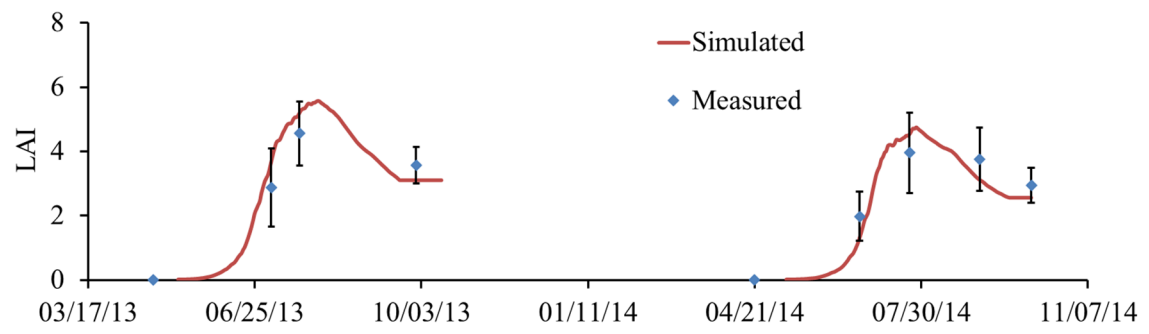

**Figure S19.** Comparison of measured and simulated leaf area index (LAI) under N168 treatment in Sandy loam soil

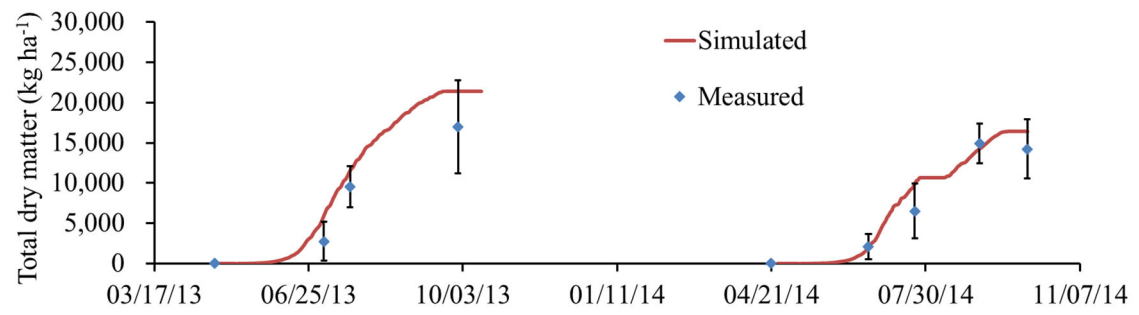

**Figure S20.** Comparison of measured and simulated total dry matter (TDM) under N168 treatment in Sandy loam soil.

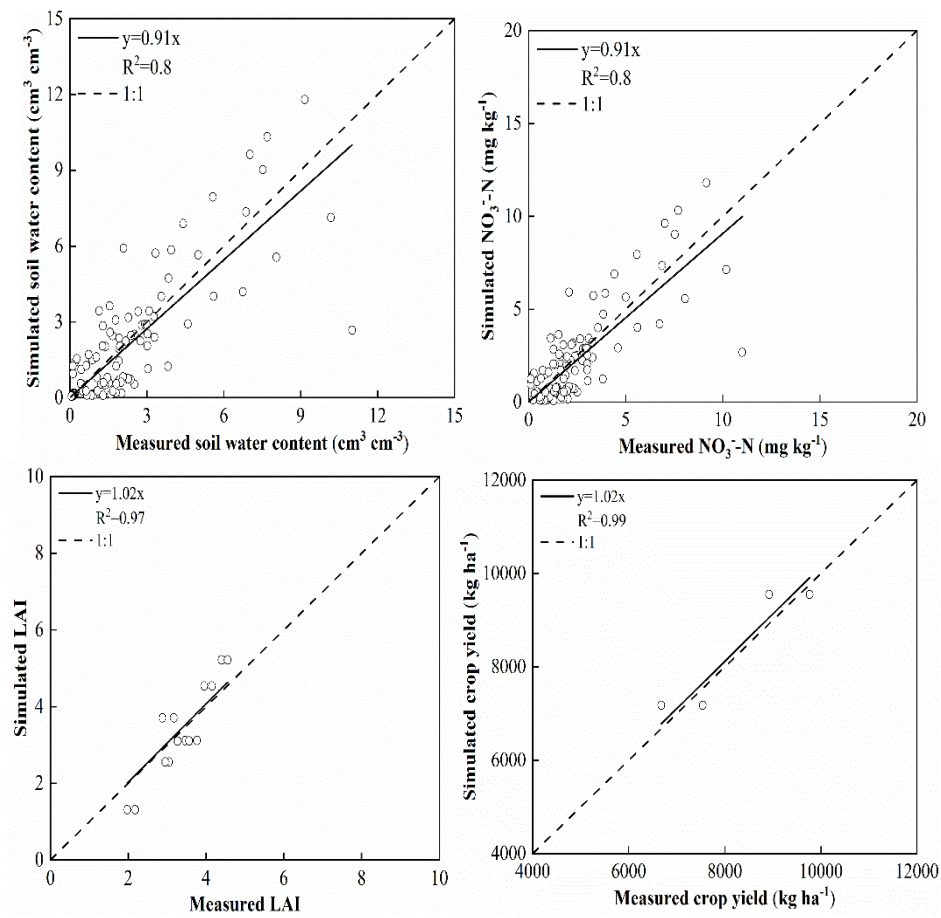

**Figure S21.** The relationship between measured and simulated soil water contents, nitrate concentrations, crop yields, and LAI under the validation treatments in Sandy loam soil.

**Table S1.** Soil physical-chemical properties for soil profile in two experimental sites.

| Site     | Soil organic<br>matter<br>g kg <sup>-1</sup> | total N<br>g kg <sup>-1</sup> | pH   | Alkaline-N<br>mg kg <sup>-1</sup> | Olsen-P<br>mg kg <sup>-1</sup> | Available-K<br>mg kg <sup>-1</sup> |
|----------|----------------------------------------------|-------------------------------|------|-----------------------------------|--------------------------------|------------------------------------|
| Fujiajie | 13.2                                         | 1.01                          | 6.71 | 58.8                              | 13.6                           | 43                                 |
| Sankeshu | 25.3                                         | 1.69                          | 6.16 | 128.2                             | 43.9                           | 122                                |

**Table S2.** Analysis of significant different for yield and nitrogen uptake under different N rates for two textural soils in 2013 and 2014.

| Soil       | Pattern | Yield (kg ha <sup>-1</sup> ) |            | N uptake (kg ha <sup>-1</sup> ) |         |
|------------|---------|------------------------------|------------|---------------------------------|---------|
|            |         | 2013                         | 2014       | 2013                            | 2014    |
| Sandy loam | N168    | 8922±11b                     | 6677±299a  | 136±2b                          | 120±2a  |
|            | N240    | 9767±172a                    | 7541±368a  | 178±7a                          | 150±26a |
|            | N312    | 9826±249a                    | 6808±421a  | 172±2a                          | 167±24a |
|            | average | 9505±170b                    | 7008±205b  | 162±6b                          | 146±13b |
| Loamy clay | N168    | 9947±343a                    | 11923±725a | 197±7a                          | 186±10a |
|            | N240    | 11478±58a                    | 12576±228a | 195±4a                          | 203±12a |
|            | N312    | 10895±421a                   | 11822±639a | 201±10a                         | 211±6a  |
|            | average | 10439±223a                   | 12107±349a | 197±4a                          | 200±6b  |

Note: means between treatments followed by different letters indicated a significant difference at P<0.05
